# Supplementary material for: crisprSQL: a novel database platform for CRISPR/Cas off-target cleavage assays
Source: PubMed Central journal article supplement (PMC7778913; doi:10.1093/nar/gkaa885), 2020-10-21
Supplement: gkaa885_supplemental_file.pdf [file gkaa885_supplemental_file.pdf]

## Cleavage Frequency Definition

Where mutation frequencies, indel frequencies or similar terms were given, we used these values for the cleavage frequency value. In case only relative read counts were given, cleavage frequency was calculated as the read ratio relative to the sum of reads for a given guide.

## Data Normalisation

In order to compare cleavage frequencies across studies, references (1) and (2) suggest transforming cleavage rates to approximate a Gaussian with zero mean and variance  $\sigma^2=2$  using the nonlinear Box–Cox transformation (3). Values above and below  $\pm 2\sigma$  should be capped in order to achieve a fixed value range. As a logarithmic transformation, it is only valid for values larger than zero, which is why measured cleavage rates below the lowest reported measurement accuracy ( $10^{-5}$  in our case) should be manually transformed to  $-2\sigma$  (this should only apply to a select few data points). Supplementary Figure 1 exemplifies a transformation of this kind, which under certain circumstances allows the comparison of cleavage frequencies between studies and is essential e.g. for the assembly of a cross-study training set for off-target cleavage prediction algorithms.

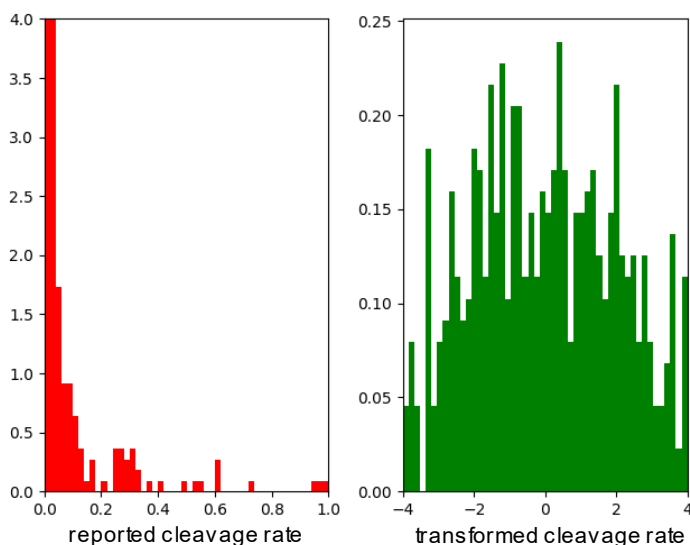

Supplementary Figure 1: Nonlinear transformation of the cleavage rate distribution at the example of study (4). Red bars (left) indicate the distribution before transformation, green bars after (right). The transformed distribution approaches a Gaussian with mean zero and variance  $\sigma^2=2$  as desired, with values at  $\pm 4$  overemphasised due to capping.

## References

- (1) Listgarten, J., Weinstein, M., Kleinstiver, B. P., Sousa, A. A., Joung, J. K., Crawford, J., Gao, K., Hoang, L., Elibol, M., Doench, J. G. et al. (2018) Prediction of off-target activities for the end-to-end design of CRISPR guide RNAs. *Nat. Biomed. Eng.*, **2**, 38–47.
- (2) Wang, J., Xiang, X., Cheng, L., Zhang, X. and Luo, Y. (2019) CRISPR-GNL: an improved model for predicting CRISPR activity by machine learning and featurization. *bioRxiv* doi: <https://doi.org/10.1101/605790>, 11 April 2019, pre-print: not peer-reviewed.
- (3) Box, G. E. P. and Cox, D. R. (1964) An Analysis of Transformations. *J. R. Stat. Soc. B*, **26**, 211–252.
- (4) Tsai, S. Q., Zheng, Z., Nguyen, N. T., Liebers, M., Topkar, V. V., Thapar, V., Wyvekens, N., Khayter, C., Iafrate, A. J., Le, L. P. et al. (2015) GUIDE-seq enables genome-wide profiling of off-target cleavage by CRISPR-Cas nucleases. *Nat. Biotechnol.*, **33**, 187–198.

## Tables

| Database field | GU_allowed | pos_weight | pam_corr | grna_folding | dna_opening | dna_pos_wgh |
|----------------|------------|------------|----------|--------------|-------------|-------------|
| energy_1       | False      | False      | False    | True         | False       | False       |
| energy_2       | False      | True       | True     | False        | True        | True        |
| energy_3       | False      | True       | False    | False        | True        | True        |
| energy_4       | False      | False      | True     | False        | False       | False       |
| energy_5       | False      | False      | False    | False        | False       | True        |

Supplementary Table 1: Arguments for the `crisprspec.get_eng()` function with which CRISPRspec energy values have been retrieved.

| No. | study                            | assay type | cell line |
|-----|----------------------------------|------------|-----------|
| 1   | <a href="#">SCREEN ENCODE v4</a> | DNase      | embryo    |
| 2   | <a href="#">SCREEN ENCODE v4</a> | H3K4me3    | embryo    |
| 3   | <a href="#">SCREEN ENCODE v4</a> | H3K4me3    | HAP1      |
| 4   | <a href="#">SCREEN ENCODE v4</a> | CTCF       | HEK293    |
| 5   | <a href="#">SCREEN ENCODE v4</a> | CTCF       | HeLa      |
| 6   | <a href="#">SCREEN ENCODE v4</a> | DNase      | HeLa      |
| 7   | <a href="#">SCREEN ENCODE v4</a> | H3K4me3    | HeLa      |
| 8   | <a href="#">SCREEN ENCODE v4</a> | CTCF       | K562      |
| 9   | <a href="#">SCREEN ENCODE v4</a> | DNase      | K562      |
| 10  | <a href="#">SCREEN ENCODE v4</a> | H3K4me3    | K562      |
| 11  | <a href="#">GSM2871902</a>       | H3K4me3    | HAP1      |
| 12  | <a href="#">GSE68948</a>         | DRIP       | HEK293    |
| 13  | <a href="#">GSM683769</a>        | RRBS       | HEK293    |
| 14  | <a href="#">GSM720354</a>        | RRBS       | HEK293    |
| 15  | <a href="#">GSM720355</a>        | RRBS       | HEK293    |
| 16  | <a href="#">GSM2711412</a>       | H3K4me3    | HEK293    |
| 17  | <a href="#">GSM2902639</a>       | DNase      | HEK293    |
| 18  | <a href="#">ENCF001TOL</a>       | RRBS       | K562      |
| 19  | <a href="#">ENCF001TOM</a>       | RRBS       | K562      |

| No. | study                       | assay type | cell line |
|-----|-----------------------------|------------|-----------|
| 20  | <a href="#">GSM683780</a>   | RRBS       | K562      |
| 21  | <a href="#">GSM683825</a>   | RRBS       | K562      |
| 22  | <a href="#">GSM683856</a>   | RRBS       | K562      |
| 23  | <a href="#">GSM1720619</a>  | DRIP       | K562      |
| 24  | <a href="#">GSE87831</a>    | DNase      | U2OS      |
| 25  | <a href="#">GSE87831</a>    | DNase      | U2OS      |
| 26  | <a href="#">GSM1296149</a>  | CTCF       | U2OS      |
| 27  | <a href="#">GSM1683507</a>  | DRIP       | U2OS      |
| 28  | <a href="#">GSM3147770</a>  | H3K4me3    | U2OS      |
| 29  | <a href="#">GSM3196008</a>  | DRIP       | U2OS      |
| 30  | <a href="#">ENCFF813SKE</a> | DNase      | HAP1      |
| 31  | <a href="#">ENCFF944IGS</a> | DNase      | HAP1      |
| 32  | <a href="#">ENCFF018VMV</a> | CTCF       | HEK293    |
| 33  | <a href="#">ENCFF127KSH</a> | DNase      | HEK293    |
| 34  | <a href="#">ENCFF781HLM</a> | H3K4me3    | HEK293    |
| 35  | <a href="#">ENCFF781HLM</a> | H3K4me3    | HEK293    |
| 36  | <a href="#">ENCFF148POZ</a> | H3K4me3    | K562      |
| 37  | <a href="#">ENCFF251TOG</a> | H3K4me3    | K562      |
| 38  | <a href="#">ENCFF500EUY</a> | H3K4me3    | K562      |
| 39  | <a href="#">ENCFF616DLO</a> | H3K4me3    | K562      |
| 40  | <a href="#">ENCFF718PBW</a> | DNase      | K562      |
| 41  | <a href="#">ENCFF843VHC</a> | CTCF       | K562      |
| 42  | <a href="#">ENCFF875WSG</a> | DNase      | K562      |
| 43  | <a href="#">ENCFF961SPZ</a> | H3K4me3    | K562      |
| 44  | <a href="#">ENCFF001YOC</a> | DNase      | embryo    |

| No. | study                       | assay type | cell line |
|-----|-----------------------------|------------|-----------|
| 45  | <a href="#">ENCFF940SWY</a> | DNase      | embryo    |
| 46  | <a href="#">ENCFF041TGX</a> | DNase      | embryo    |
| 47  | <a href="#">ENCFF357JNZ</a> | H3K4me3    | embryo    |
| 48  | <a href="#">ENCFF940SWY</a> | CTCF       | embryo    |
| 49  | <a href="#">ENCFF915PWP</a> | CTCF       | HeLa      |
| 50  | <a href="#">ENCFF474KGT</a> | CTCF       | HeLa      |
| 51  | <a href="#">ENCFF001TMU</a> | RRBS       | HeLa      |
| 52  | <a href="#">ENCFF001TMV</a> | RRBS       | HeLa      |
| 53  | <a href="#">ENCFF351NVE</a> | DNase      | HeLa      |
| 54  | <a href="#">ENCFF982QSW</a> | H3K4me3    | HeLa      |
| 55  | <a href="#">ENCFF542GBR</a> | H3K4me3    | HeLa      |
| 56  | <a href="#">ENCFF201KBA</a> | H3K4me3    | HeLa      |
| 57  | <a href="#">ENCFF102MXI</a> | H3K4me3    | HeLa      |
| 58  | <a href="#">GSM2668157</a>  | DRIP       | HeLa      |
| 59  | <a href="#">GSM2452072</a>  | DRIP       | HeLa      |
| 60  | <a href="#">ENCFF331BAX</a> | CTCF       | HeLa      |
| 61  | <a href="#">ENCFF862FGB</a> | CTCF       | HeLa      |
| 62  | <a href="#">ENCFF095GJF</a> | DNase      | HeLa      |
| 63  | <a href="#">ENCFF186BOU</a> | DNase      | HeLa      |
| 64  | <a href="#">ENCFF879GTR</a> | DNase      | HeLa      |
| 65  | <a href="#">ENCFF029YMX</a> | H3K4me3    | HeLa      |
| 66  | <a href="#">ENCFF850XBJ</a> | H3K4me3    | HeLa      |
| 67  | <a href="#">ENCFF336AJX</a> | H3K4me3    | HeLa      |
| 68  | <a href="#">ENCFF479ZEP</a> | H3K4me3    | HeLa      |
| 69  | <a href="#">ENCFF455VLU</a> | DNase      | HAP1      |

Supplementary Table 2: Epigenetic assay files currently included in the database, including the assay type and cell line to which they apply. This overview is reproduced from <http://crisprsql.com/epigen.php>.
